1 Cortical processing of breathing perceptions in the athletic brain

2 Olivia K. Faull<sup>1,2,3</sup>, Pete J. Cox<sup>3</sup>, Kyle T. S. Pattinson<sup>1,2</sup>

3

4 <sup>1</sup>FMRIB Centre and <sup>2</sup>Nuffield Division of Anesthetics, Nuffield Department of Clinical  
5 Neurosciences, University of Oxford, Oxford, UK, and <sup>3</sup>Department of Physiology, Anatomy  
6 and Genetics, University of Oxford, Oxford, UK

7

8

9 Running title: Athlete breathlessness brain networks

10 Key words: athletes, breathlessness, interoception, fMRI, ventilation

11

12

13 **Corresponding author:**

14 Dr Olivia Faull

15 Nuffield Department of Clinical Neurosciences

16 University of Oxford

17 Oxford, UK

18 Email: [olivia.faull@ndcn.ox.ac.uk](mailto:olivia.faull@ndcn.ox.ac.uk)

19 Phone: +44 (0)1865 34544

20 Fax: +44 (0)1865 23079

21

22

## 23 **Abstract**

24 Athletes regularly endure large increases in ventilation, and accompanying perceptions of  
25 breathlessness. While breathing perceptions often correlate poorly with objective measures of  
26 lung function in both health and clinical populations, we have previously demonstrated closer  
27 matching between subjective breathlessness and changes in ventilation in endurance athletes,  
28 suggesting that athletes may be more accurate during respiratory interoception. To better  
29 understand the link between exercise and breathlessness, we sought to identify the mechanisms  
30 by which the brain processing of respiratory perception might be optimised in athletes.

31 Twenty endurance athletes and 20 sedentary controls underwent 7 Tesla functional  
32 magnetic resonance imaging. Inspiratory resistive loading induced conscious breathing  
33 perceptions (breathlessness), and a delay-conditioning paradigm was employed to evoke  
34 preceding periods of anticipation. Athletes demonstrated anticipatory brain activity that  
35 positively correlated with resulting breathing perceptions within key interoceptive areas, such as  
36 the thalamus, insula and primary sensorimotor cortices, which was negatively correlated in  
37 sedentary controls. Athletes also exhibited greater connectivity between interoceptive attention  
38 networks and primary sensorimotor cortex. These functional differences in athletic brains  
39 suggest that exercise may optimise processing of respiratory sensations. Future work may probe  
40 whether these brain mechanisms are harnessed when exercise is employed to treat breathlessness  
41 within chronic respiratory disease.

## 42 **Introduction**

43 Athletes are able to undertake incredible feats of human achievement, with faster, higher and  
44 stronger performances recorded each year. Whilst exercise training is known to induce  
45 widespread physiological changes in the periphery, the concurrent changes in the structure and  
46 function of the athletic brain are less well investigated. For endurance athletes, exercise training  
47 is targeted to improve the ability of tissues to utilize oxygen in the combustion of fuels such as  
48 fat and carbohydrate, producing the energy required for repeated skeletal muscle contraction  
49 (Holloszy & Coyle, 1984; Jones & Carter, 2000). However, the role of the brain in perceiving  
50 and modulating changing sensations from the periphery, useful for maintenance of homeostasis  
51 during situations of perturbed physiology, is often overlooked.

52 Ventilation during exercise is tightly controlled, balancing neurally-modulated feed  
53 forward ventilatory commands and peripheral feedback to stimulate appropriate ventilation for  
54 exercising needs (Kaufman & Forster, 1996; Waldrop *et al.*, 2010). Interoceptive monitoring of  
55 respiratory sensations contributes to the maintenance of homeostasis (Davenport & Vovk, 2009),  
56 and with sufficient exercise intensity, the strain of immense increases in ventilation induces  
57 perceptions of breathlessness (El-Manshawi *et al.*, 1986; Takano *et al.*, 1997; Lansing *et al.*,  
58 2000; Borg *et al.*, 2010). While endurance athletes are repeatedly exposed to these respiratory  
59 sensations and breathlessness, it is as yet unknown whether brain networks involved in these  
60 perceptions may also adapt to better cope with exercise demands. This understanding would  
61 allow us to explore how processing of ventilatory signals might be altered in different states,  
62 such as in athletes or conversely in chronic respiratory disease, where subjective reports of  
63 breathlessness are often discordant with objective measures of lung function and ventilation  
64 (Herigstad *et al.*, 2017).

65           Importantly, prior experiences of strong respiratory sensations may also alter the way  
66 someone anticipates and perceives their breathing (Faull *et al.*, 2017; Van den Bergh *et al.*, 2017;  
67 Herigstad *et al.*, 2017). Expectations regarding upcoming respiratory sensations from  
68 conditioned cues (Pavlov, 1927), for example the breathlessness associated with an approaching  
69 hill whilst running, can be an important influence on both threat behaviours and preventative  
70 actions (i.e. to avoid the hill) (Lang *et al.*, 2011), or on the perception itself (Price *et al.*, 1999;  
71 Porro *et al.*, 2002; Wager *et al.*, 2004). Repeated breathlessness exposure may alter this  
72 anticipation in athletes, focusing their attention towards respiratory sensations (Merikle &  
73 Joordens, 1997; Phelps *et al.*, 2006; Ling & Carrasco, 2006), reducing their anxiety (Spinhoven  
74 *et al.*, 1997; Bogaerts *et al.*, 2005; Tang & Gibson, 2005) or improving their interoceptive ability  
75 (Gray *et al.*, 2007; Critchley *et al.*, 2013; Mallorqui-Bague *et al.*, 2016; Garfinkel *et al.*, 2016b;  
76 2016a). Interestingly, exercise therapy is currently the most effective treatment for  
77 breathlessness associated with chronic obstructive pulmonary disease (COPD), improving  
78 breathlessness intensity and anxiety (Carrieri-Kohlman *et al.*, 1996; 2001; Herigstad *et al.*,  
79 2017), without concurrent improvements in lung function. It is possible that athletes may have  
80 different prior expectations and anticipation of breathlessness, although this has yet to be  
81 investigated.

82           In previous work we have observed closer matching between changes in ventilation and  
83 perceptions of breathlessness in endurance athletes compared to sedentary individuals (Faull *et*  
84 *al.*, 2016a). Here, we sought to identify how the brain processing of both anticipation and  
85 perception of respiratory sensations may be altered in these athletes, to better understand  
86 potential contributors to ventilatory interoception. We investigated functional brain activity using  
87 magnetic resonance imaging (fMRI) during both conditioned anticipation and perception of a

88 breathlessness stimulus. We also examined potential differences in the resting temporal  
89 coherence, or ‘functional connectivity’ (Gerstein & Perkel, 1969; Van Den Heuvel & Pol, 2010)  
90 of brain networks involved in attention towards sensory information, allostasis and interoception  
91 (Kleckner *et al.*, 2017). Differences in underlying functional connectivity may help us to  
92 understand how the athlete brain may be altered to facilitate accurate respiratory perceptions, and  
93 we hypothesized that these athletes would demonstrate both altered functional breathlessness-  
94 related brain activity and connectivity compared to their sedentary counterparts.

95

96

## 97 **Materials and Methods**

### 98 **Subjects**

99 The Oxfordshire Clinical Research Ethics Committee approved the study and volunteers gave  
100 written, informed consent. Forty healthy, right-handed individuals undertook this study, with no  
101 history of smoking or any respiratory disease. This cohort comprised two groups; 20 subjects  
102 who regularly participated in endurance sport, and 20 age- and sex-matched ( $\pm 2$  years) sedentary  
103 subjects (in each group: 10 males, 10 females; mean age  $\pm$  SEM,  $26 \pm 1.7$  years). Athletes were  
104 active participants in endurance sports (cycling, rowing and endurance running), with training  
105 sessions conducted at least 5 times per week. Sedentary subjects did not partake in any regular  
106 exercise or sport. Prior to scanning, all subjects underwent breathlessness testing during exercise  
107 and chemostimulated hyperpnea, which have been presented elsewhere (Faull *et al.*, 2016a), and  
108 a combined whole-group analysis of fMRI data has been previously reported (Faull & Pattinson,  
109 2017).

110

111 **Stimuli and tasks**

112 Subjects were trained using an aversive delay-conditioning paradigm to associate simple shapes  
113 with an upcoming breathlessness (inspiratory resistance) stimulus (Faull & Pattinson, 2017). A  
114 breathing system was used to remotely administer periods of inspiratory resistive loading to  
115 induce breathlessness (as predicted by the conditioned cues). The breathing system contained an  
116 inspiratory resistance arm (using a porous glass disk) with a non-rebreathing valve connected to  
117 a mouth piece, which could be periodically applied using the addition or removal of medical air  
118 through an alternative inspiratory non-rebreathing arm (detailed in (Faull et al., 2016b; Faull &  
119 Pattinson, 2017)). Mean peak inspiratory resistance was recorded at 14.7 ( $\pm$ 8.3) cmH<sub>2</sub>O for the  
120 loading periods across subjects, and group values are presented in Tables 1 and 2. The subject's  
121 nose was blocked using foam earplugs and they were asked to breathe through their mouth for  
122 the duration of the experiment.

123 Two conditions were trained: 1) A shape that always predicted upcoming breathlessness  
124 (100% contingency pairing), and 2) A shape that always predicted unloaded breathing (0%  
125 contingency pairing with inspiratory resistance). The 'certain upcoming breathlessness' symbol  
126 was presented on the screen for 30 s, which included a varying 5-15 s anticipation period before  
127 the loading was applied. The 'unloaded breathing' symbol was presented for 20 s, and each  
128 condition was repeated 14 times in a randomised order. Conscious associations between cue and  
129 threat level (cue contingencies) were required and verified in all subjects by reporting (in  
130 writing) the meaning of each of the symbols both following the training session and immediately  
131 prior to the MRI scan.

132 Rating scores of breathing intensity were recorded after every stimulus, using a visual-  
133 analogue scale (VAS) with a sliding bar to answer the question 'How difficult was the previous

134 stimulus?’ where the subjects moved between ‘Not at all difficult’ (0%) and ‘Extremely difficult’  
135 (100%). Subjects were also asked to rate how anxious each of the symbols made them feel  
136 (‘How anxious does this symbol make you feel?’) using a VAS between ‘Not at all anxious’  
137 (0%) and ‘Extremely anxious’ (100%) immediately following the functional MRI protocol.

138

### 139 **Physiological measurements**

140 We used established methods to decorrelate the effects of hypercapnia from the localised BOLD  
141 responses associated with breathing against an inspiratory resistance, using additional, matched  
142 carbon dioxide (CO<sub>2</sub>) boluses interspersed during rest periods in the fMRI protocols as  
143 previously described (Pattinson *et al.*, 2009b; Faull *et al.*, 2015; 2016b). In addition, a mildly  
144 hyperoxic state was achieved through a constant administration of oxygen at a rate of 0.5 L/min,  
145 to minimise fluctuations in end-tidal oxygen (P<sub>ET</sub>O<sub>2</sub>) (Table 1). Physiological measures were  
146 recorded continuously using respiratory bellows surrounding the chest, and heart rate was  
147 measured using a pulse oximeter (9500 Multigas Monitor, MR Equipment Corp., NY, USA)  
148 during the training session and MRI scan, as previously described (Faull *et al.*, 2016b).

149

### 150 **MRI scanning sequences**

151 MRI was performed with a 7 T Siemens Magnetom scanner, with 70 mT/m gradient strength and  
152 a 32 channel Rx, single channel birdcage Tx head coil (Nova Medical).

153 *BOLD scanning:* A T2\*-weighted, gradient echo EPI was used for functional scanning.

154 The field of view (FOV) covered the whole brain and comprised 63 slices (sequence parameters:  
155 TE, 24 ms; TR, 3 s; flip angle, 90°; voxel size, 2 x 2 x 2 mm; field of view, 220 mm; GRAPPA  
156 factor, 3; echo spacing, 0.57 ms; slice acquisition order, descending), with 550 volumes (scan

157 duration, 27 mins 30 s) for the task fMRI, and 190 volumes (scan duration, 9 mins 30 s) for a  
158 following resting-state acquisition (eyes open).

159 *Structural scanning:* A T1-weighted structural scan (MPRAGE, sequence parameters:  
160 TE, 2.96 ms; TR, 2200 ms; flip angle, 7°; voxel size, 0.7 x 0.7 x 0.7 mm; field of view, 224 mm;  
161 inversion time, 1050 ms; bandwidth; 240 Hz/Px) was acquired. This scan was used for  
162 registration of functional images.

163 *Additional scanning:* Fieldmap scans (sequence parameters: TE1, 4.08 ms; TE2, 5.1 ms;  
164 TR, 620 ms; flip angle, 39°; voxel size, 2 x 2 x 2 mm) of the B<sub>0</sub> field were also acquired to assist  
165 distortion-correction.

166

### 167 **Physiological data analysis**

168 Values for end-tidal CO<sub>2</sub> (P<sub>ET</sub>CO<sub>2</sub>) were extrapolated for use as noise regressor in fMRI analysis  
169 (explained below). Respiratory waveforms, respiratory volume per unit time (RVT) and cardiac  
170 pulse oximetry triggers were included in the image denoising procedures (explained below),  
171 Values for mean and peak resistive loading, mean P<sub>ET</sub>CO<sub>2</sub> and P<sub>ET</sub>O<sub>2</sub>, respiratory rate and RVT  
172 were calculated across each time block using custom written scripts in MATLAB (R2013a, The  
173 Mathworks, Natick, MA). Measures were averaged across each subject in each condition  
174 (unloaded breathing, anticipation and breathlessness). Peak mouth pressure was also calculated  
175 in each block and averaged in each subject for the resistive loading condition. Mean peak mouth  
176 pressure, breathlessness intensity and breathlessness anxiety ratings were then compared  
177 between the two groups using a student's paired T-test.

178

### 179 **Imaging analysis**



180 *Preprocessing:* Image processing was performed using the Oxford Centre for Functional  
181 Magnetic Resonance Imaging of the Brain Software Library (FMRIB, Oxford, UK; FSL version  
182 5.0.8; <http://www.fmrib.ox.ac.uk/fsl/>). The following preprocessing methods were used prior to  
183 statistical analysis: motion correction and motion parameter recording (MCFLIRT (Jenkinson *et*  
184 *al.*, 2002)), removal of the non-brain structures (skull and surrounding tissue) (BET (Smith,  
185 2002)), spatial smoothing using a full-width half-maximum Gaussian kernel of 2 mm, and high-  
186 pass temporal filtering (Gaussian-weighted least-squares straight line fitting; 120 s).  $B_0$  field  
187 unwarping was conducted with a combination of FUGUE and BBR (Boundary-Based-  
188 Registration; part of FEAT: FMRI Expert Analysis Tool, version 6.0 (Greve & Fischl, 2009)).  
189 Data denoising was conducted using a combination of independent components analysis (ICA)  
190 and retrospective image correction (RETROICOR) (Harvey *et al.*, 2008; Brooks *et al.*, 2013)  
191 using the externally recorded physiological measures (as previously described (Faull *et al.*,  
192 2016b)), and included simultaneous regression of motion parameters.

193 *Image registration:* Following preprocessing, the functional scans were registered to the  
194 MNI152 (1x1x1 mm) standard space (average T1 brain image constructed from 152 normal  
195 subjects at the Montreal Neurological Institute (MNI), Montreal, QC, Canada) using a two-step  
196 process: 1) Registration of subjects' whole-brain EPI to T1 structural image was conducted using  
197 BBR (6 DOF) with (nonlinear) fieldmap distortion-correction (Greve & Fischl, 2009), and 2)  
198 Registration of the subjects' T1 structural scan to 1 mm standard space was performed using an  
199 affine transformation followed by nonlinear registration (FNIRT) (Andersson *et al.*, 2007).

200 *Functional voxelwise and group analysis:* Functional data processing was performed  
201 using FEAT (FMRI Expert Analysis Tool), part of FSL. The first-level analysis in FEAT  
202 incorporated a general linear model (Woolrich *et al.*, 2004), with the following regressors:

203 Resistive loading periods (calculated from physiological pressure trace as onset to termination of  
204 each application of resistance); anticipation of breathlessness (calculated from onset of  
205 anticipation symbol to onset of resistance application); and unloaded breathing (onset and  
206 duration of ‘unloaded breathing’ symbol). Additional regressors to account for relief from  
207 breathlessness, periods of rating using the button box, demeaned ratings of intensity between  
208 trials, and a period of no loading following the final anticipation period (for decorrelation  
209 between anticipation and breathlessness) were also included in the analysis. A final  $P_{ET}CO_2$   
210 regressor was formed by linearly extrapolating between end-tidal  $CO_2$  peaks, and included in the  
211 general linear model to decorrelate any  $P_{ET}CO_2$ -induced changes in BOLD signal from the  
212 respiratory tasks (McKay *et al.*, 2008; Pattinson *et al.*, 2009a; 2009b; Faull *et al.*, 2015; 2016b).  
213 Contrasts for breathlessness (vs. baseline) and differential contrasts of anticipation of  
214 breathlessness > unloaded breathing (referred to as ‘anticipation’ or ‘anticipation of  
215 breathlessness’) were investigated at the group level.

216 Functional voxelwise analysis incorporated HRF modeling using three FLOBS regressors  
217 to account for any HRF differences caused by slice-timing delays, differences across the  
218 brainstem and cortex, or between individuals (Handwerker *et al.*, 2004; Devonshire *et al.*, 2012).  
219 Time-series statistical analysis was performed using FILM, with local autocorrelation correction  
220 (Woolrich *et al.*, 2001). The second and third waveforms were orthogonalised to the first to  
221 model the ‘canonical’ HRF, of which the parameter estimate was then passed up to the group  
222 analysis in a mixed-effects analysis. Group analysis was conducted using rigorous permutation  
223 testing of a General Linear Model (GLM) using FSL’s Randomize tool (Winkler *et al.*, 2014),  
224 where the GLM consisted of group mean BOLD activity for each group, and demeaned,  
225 separated breathlessness intensity and anxiety covariates for each group. Including

226 breathlessness scores into the anticipation contrast allows us to identify preparatory brain activity  
227 that predicts the subsequent breathlessness perception when the stimulus is applied. Mean  
228 voxelwise differences between groups were calculated, as well as the interactions between group  
229 and breathlessness intensity / anxiety scores. A stringent initial cluster-forming threshold of  $t =$   
230 3.1 was used, in light of recent reports of lenient thresholding previously used in fMRI (Eklund  
231 *et al.*, 2016), and images were family-wise-error (FWE) corrected for multiple comparisons.  
232 Significance was taken at  $p < 0.05$  (corrected).

233 *Resting functional connectivity analysis:* Following preprocessing and image registration,  
234 resting state scans from all subjects were temporally concatenated and analysed using  
235 independent component analysis (ICA) using MELODIC (Beckmann & Smith, 2004), part of  
236 FSL. ICA decomposes the data into a set of spatial maps and their associated timecourses,  
237 referred to as ‘functional networks’. Model order in the group ICA was set to 25 spatially  
238 independent components. Dual regression (Beckmann *et al.*, 2009) was then used to delineate  
239 subject-specific timecourses of these components, and their corresponding subject-specific  
240 spatial maps. Subject-specific spatial maps were again analysed non-parametrically using  
241 Randomise (part of FSL) (Winkler *et al.*, 2014) with the same GLM and significance thresholds  
242 previously applied to the functional task group analysis. Twenty components were identified as  
243 signal, and two components of interest (‘default mode’ network and ‘task positive’ network)  
244 were considered for group differences, in accordance with recent interoceptive research  
245 (Kleckner *et al.*, 2017). Therefore,  $p$  threshold significance was adjusted to  $p < 0.025$  using  
246 Bonferroni correction for multiple comparisons.

247

248

## 249 **Results**

### 250 **Physiology and psychology of breathlessness**

251 Mean physiological values for each group for mouth pressure,  $P_{ET}CO_2$ ,  $P_{ET}O_2$ , RVT, respiratory  
252 rate and RVT are presented in Table 1. Group scores for breathlessness intensity and anxiety are  
253 presented in Table 2, with no mean differences observed between groups. Previously, we have  
254 reported a difference in the accuracy between subjective breathlessness scores and changes in  
255 ventilation induced via a hypercapnic challenge (Faull *et al.*, 2016a) in the same subjects used as  
256 the current study. For clarity, we have reproduced the results here in Figure 4.

257

### 258 **Task fMRI analysis**

259 *Mean group differences:* Mean activity during anticipation of breathlessness in each group is  
260 presented in Figure 1. In sedentary subjects, significantly increased BOLD activity was observed  
261 in the right anterior insula, operculum and bilateral primary motor cortex, and decreased BOLD  
262 activity in bilateral posterior cingulate cortex, precuneus, lateral occipital cortex, hippocampus,  
263 parahippocampal gyrus and amygdala. In athletes, increased BOLD activity was observed in  
264 bilateral anterior insula, operculum and primary motor cortex, and right supplementary motor  
265 cortex, and decreased BOLD activity in bilateral precuneus, hippocampus, parahippocampal  
266 gyrus and amygdala. No statistically significant voxelwise differences were observed between  
267 group mean activities during anticipation of breathlessness (differentially contrasted against  
268 unloaded breathing).

269 Mean activity during breathlessness in each group is presented in Figure 1. In sedentary  
270 subjects, significantly increased BOLD activity was observed in the bilateral anterior and middle  
271 insula, operculum, primary sensory and motor cortices, supplementary motor cortex,

272 supramarginal gyrus and cerebellar VI, and decreased BOLD activity in bilateral precuneus. In  
273 athletes, significantly increased BOLD activity was observed in the right dorsolateral prefrontal  
274 cortex, bilateral anterior and middle insula, operculum, primary sensory and motor cortices,  
275 supplementary motor cortex, left visual cortex and cerebellar Crus-I, and decreased BOLD  
276 activity in right amygdala, hippocampus and superior temporal gyrus. No statistically significant  
277 voxelwise differences were observed between group mean activities during breathlessness.

278 *Subjective breathlessness scores:* The brain activity that correlated with breathlessness  
279 scores of intensity and anxiety was compared between groups, to identify any interaction effects  
280 (group x subjective score). Interaction effects establish that the difference between groups varies  
281 as a function of the covariate (subjective scores). Athletes demonstrated widespread brain  
282 activity positively correlating with (predicted) intensity scores during anticipation of  
283 breathlessness (Figure 2), whilst those same areas had a negative correlation in sedentary  
284 subjects (interaction). This included activity in the bilateral ventral posterolateral nucleus of the  
285 thalamus, middle insula, and primary motor and sensory cortices, as well as left anterior insula.  
286 In contrast, a small amount of activity in the right putamen and caudate nucleus correlated with  
287 anxiety in sedentary subjects, but not in athletes during anticipation. No significant interactions  
288 between groups were present for either intensity of anxiety during breathlessness perception.

289

## 290 **Resting state network connectivity**

291 Of the 25 resting state ‘networks’ identified in the group ICA analysis, 20 components were  
292 identified to represent relevant signal (19 cortical, 1 cerebellar) while the remaining 5 were  
293 labeled as noise (see supplementary material for a summary the 20 resting networks). Two  
294 networks of interest were identified for group comparison analyses (as determined by Kleckner

295 et al., 2017): 1) The network most representative of the typical ‘default mode’, and 2) A network  
296 containing components of previously identified visual and dorsal attention networks (Vossel *et*  
297 *al.*, 2014), which was notably most similar to the breathing task contrasts (‘task-positive’  
298 network) (Figure 3). When network connectivity was compared between athletes and controls,  
299 athletes were found to have significantly greater ( $p = 0.019$ ) connectivity of the task-positive  
300 network to an area of primary motor cortex active during resistive loading (Figure 3).

301

302

## 303 **Discussion**

### 304 **Main findings**

305 We have identified a cohesive anticipatory brain network that predicts upcoming subjective  
306 ratings of breathlessness in athletes. Comparatively, this brain activity was reversed (i.e.  
307 negatively correlated with upcoming breathlessness ratings) in sedentary controls. Furthermore,  
308 at rest, athletes demonstrated greater connectivity between an area of breathing-related primary  
309 sensorimotor cortex, and a cingulo-opercular attention network that is strikingly similar to that  
310 recently identified to be involved in allostatic-interoceptive processing (Kleckner *et al.*, 2017).  
311 This network may therefore be integral within attention and processing of sensory signals related  
312 to breathing. Increased connectivity between sensorimotor cortex and this brain network may  
313 underlie the observed differences in anticipatory processing of respiratory signals, and the  
314 improved ventilatory perceptive accuracy found in these endurance athletes.

315

### 316 **Breathlessness processing in athletes**

317 Endurance athletes have repeated episodes of elevated ventilation and perceptions of  
318 breathlessness as part of their training. In previously published results (Faull *et al.*, 2016a), we  
319 have demonstrated improved psychophysical matching between changes in chemostimulated  
320 hyperventilation and subjective breathlessness perceptions in these athletes compared to matched  
321 sedentary subjects (Figure 4). Therefore, whether by nature or nurture, these individuals appear  
322 to have improved ventilatory perception accuracy. The reduced correlation between changes in  
323 ventilation and perceptions of breathlessness demonstrated in sedentary subjects implies a  
324 worsened ability to process respiratory sensations, which may be a risk factor for symptom  
325 discordance in disease (Van den Bergh *et al.*, 2017).

326 In accordance with behavioural findings, here we have observed differences in the brain  
327 processing of breathing perceptions in athletes. Specifically, a coherent network of brain activity  
328 corresponding to breathlessness intensity scores was observed during anticipation in athletes,  
329 which was reversed (negatively correlated) with subjective scores in sedentary subjects. This  
330 network incorporates key areas involved in sensorimotor control and interoception, such as the  
331 thalamus, insula and primary sensorimotor cortices (Feldman & Friston, 2010; Simmons *et al.*,  
332 2012; Feldman Barrett & Simmons, 2015; Van den Bergh *et al.*, 2017). The opposing  
333 relationship between brain activity and subjective scores in athletes and sedentary subjects  
334 indicates a fundamental difference in preparatory, anticipatory brain activity directed towards  
335 subjective perceptions between these groups, which occurs without any difference in overall  
336 group mean brain activity. Conversely, sedentary subjects demonstrated activity corresponding  
337 to anxiety scores in the ventral striatum (caudate nucleus and putamen) during anticipation of  
338 breathlessness. The striatum has been previously linked with cardiovascular responses resulting

339 from social threat (Wager *et al.*, 2009), and may represent heightened threat responses in  
340 sedentary subjects.

341         Interestingly, the intensity-related differences in brain activity were observed during the  
342 anticipation period that preceded the actual perception of breathlessness. It is possible that  
343 repeated increases in ventilation and breathlessness during training helps athletes improve the  
344 accuracy of their breathing expectations for an upcoming stimulus, such as expecting to run up a  
345 hill. Recent theories of symptom perception have proposed a comprehensive, Bayesian model  
346 (Feldman Barrett & Simmons, 2015; Van den Bergh *et al.*, 2017), which includes a set of  
347 perceptual expectations or ‘priors’. These expectations are combined with sensory information  
348 from the periphery, for the brain to probabilistically produce the most likely resulting perception.  
349 Furthermore, factors such as attention (Merikle & Joordens, 1997; Phelps *et al.*, 2006; Ling &  
350 Carrasco, 2006) and interoceptive ability (Gray *et al.*, 2007; Critchley *et al.*, 2013; Mallorqui-  
351 Bague *et al.*, 2016; Garfinkel *et al.*, 2016b) are thought to influence this system, either by  
352 altering the prior expectations or incoming sensory information.

353         While previous research had identified reduced anterior insula activity during loaded  
354 breathing in endurance athletes (Paulus *et al.*, 2012), we have not reproduced these findings  
355 when employing more stringent fMRI statistics. Nevertheless, the proposal by Paulus and  
356 colleagues (Paulus *et al.*, 2012) that athletes demonstrate more efficient minimization of the  
357 body prediction error remains a very plausible possibility. Here, instead, we have observed  
358 functional perception-related differences during anticipation of loaded breathing in endurance  
359 athletes. Therefore, repeated exercise training in athletes may develop breathlessness  
360 expectations (or priors) and better direct attention towards breathing sensations, improving the  
361 robustness of the perceptual system to accurately infer the intensity of breathlessness.



362

363 **Differences in functional connectivity within the athletic brain**

364 Understanding differences in underlying communication between functional brain regions may  
365 inform us as to why differences in functional activity, such as observed in these athletes during  
366 anticipation of breathlessness, may arise. The temporal synchronicity of seemingly spontaneous  
367 fluctuations in brain activity across spatially distinct regions can inform us of how ‘functionally  
368 connected’ these disparate regions may be, and is thought to be related to the temporal coherence  
369 of neuronal activity in anatomically distinct areas (Gerstein & Perkel, 1969; Van Den Heuvel &  
370 Pol, 2010).

371 It is now well established that the brain can be functionally parsed into resting state  
372 ‘networks’, where distinct brain regions are consistently shown to exhibit temporally similar  
373 patterns of brain activity (Smith *et al.*, 2009; Miller *et al.*, 2016). While properties of these  
374 resting state networks have been linked to lifestyle, demographic and psychometric factors  
375 (Smith *et al.*, 2015; Miller *et al.*, 2016), here we have found connectivity differences between  
376 athletes and sedentary subjects for a cingulo-opercular network. This network displays a very  
377 similar spatial distribution to the pattern of activity observed during the breathlessness tasks  
378 (‘task-positive’) (Figure 3), as well as the allostatic-interoceptive network recently identified by  
379 Kleckner and colleagues (Kleckner *et al.*, 2017), and to previously reported networks of ventral  
380 and dorsal attention (Fox *et al.*, 2005; 2006). Here, we have demonstrated greater functional  
381 connectivity in athletes between an area of primary sensory and motor cortices that has  
382 consistently been identified as active during tasks such as breath holds (Pattinson *et al.*, 2009b;  
383 Faull *et al.*, 2015) and inspiratory resistances (Faull *et al.*, 2016b; Faull & Pattinson, 2017;  
384 Hayen *et al.*, 2017). Therefore, it is possible that this greater connectivity in athletes between an

385 interoceptive attention network and primary sensorimotor cortex contributes to the processing of  
386 incoming and outgoing respiratory information, and thus may also be related to more accurate  
387 ventilatory perceptions.

388 Whilst this cross-sectional study is unable to determine whether endurance exercise  
389 training *induces* these differences in brain function and connectivity, or whether these  
390 individuals are biased towards training for endurance sports, this work provides intriguing  
391 preliminary insight that the brain may undergo adaptation in conjunction with the periphery, to  
392 more accurately process perceptions of bodily sensations such as breathlessness.

393

#### 394 **Neuroimaging statistical considerations**

395 Extensive efforts were made within the analysis of this dataset to ensure only the most robust and  
396 reliable results were reported. Firstly, physiological noise and potential motion artifacts need to  
397 be specifically addressed when using breathing-related tasks, and these can be further  
398 compounded at higher field strengths (Brooks et al., 2013). Here we employed rigorous noise  
399 correction procedures, combining retrospective image correction of physiological parameters  
400 (heart rate, ventilation and end-tidal carbon dioxide) with both extended motion parameter  
401 regression and independent component analysis de-noising (Faull et al., 2016b; Hayen et al.,  
402 2017). Secondly, recent work has revealed the potential leniency of previous fMRI statistical  
403 methodologies and thresholds (Eklund et al., 2016). In this manuscript, we have utilized minimal  
404 (2mm) spatial smoothing to maintain accurate localization of brain activity, and employed non-  
405 parametric, permutation testing with a robust cluster threshold of 3.1 (Eklund et al., 2016), to  
406 represent only the most reliable statistical results. Whilst these approaches forsake much of our  
407 previously-reported activity within these breathing-related tasks (Faull & Pattinson, 2017), we

408 can have greater confidence in our reported differences between brain and behavior in athletes  
409 and sedentary subjects.

410

### 411 **Potential clinical implications of altering breathlessness processing**

412 As discussed, prior expectations of breathlessness are now considered to be a major contributor  
413 to symptom perception (Hayen *et al.*, 2013; Faull *et al.*, 2017; Van den Bergh *et al.*, 2017;  
414 Geuter *et al.*, 2017; Herigstad *et al.*, 2017). Altering the accuracy of breathlessness perception  
415 using exercise training may be of interest when treating individuals with habitual symptomology,  
416 such as those with chronic obstructive pulmonary disease (COPD) or asthma. Recent research  
417 has shown exercise training to reduce breathlessness intensity and anxiety in patients with  
418 COPD, with corresponding changes in the brain's processing of breathlessness-related words  
419 (Herigstad *et al.*, 2016; 2017). It has been proposed that exercise exposure alters breathlessness  
420 expectations and priors in these patients, modifying symptom perception when it has become  
421 discordant with physiology in chronic disease (Parshall *et al.*, 2012; Herigstad *et al.*, 2017). It is  
422 also possible that exercise helps improve the processing of respiratory signals for more accurate  
423 ventilatory interoception in these patients, allowing breathlessness perception to better match  
424 respiratory distress. Future work investigating the link between exercise, ventilation and  
425 breathlessness perception may yield another treatment avenue (via targeted exercises) to improve  
426 patient quality of life in the face of chronic breathlessness.

427

428

## 429 **Conclusions**

430 In this study, we have demonstrated altered anticipatory brain processing of breathlessness  
431 intensity in athletes compared to sedentary subjects. This altered functional brain activity may be  
432 underpinned by increased functional connectivity between an interoceptive network related to  
433 breathlessness, and sensorimotor cortex that is active during ventilatory tasks. These differences  
434 in brain activity and connectivity may also relate to improvements in ventilatory perception  
435 previously reported between these subject groups (Faull *et al.*, 2016a), and open the door to  
436 investigating exercise as a tool to manipulate brain processing of debilitating breathing  
437 symptoms, such as breathlessness in clinical populations.

438

439

## 440 **Acknowledgements**

441 This research was supported by the JABBS Foundation. This research was further supported by  
442 the National Institute for Health Research, Oxford Biomedical Research Centre based at Oxford  
443 University Hospitals NHS Trust and University of Oxford. Olivia K Faull was supported by the  
444 Commonwealth Scholarship Commission.

445

446

## 447 **Competing interests**

448 KP has acted as a consultant for Nektar Therapeutics. The work for Nektar has no bearing on the  
449 contents of this manuscript. KP is named as a co-inventor on a provisional UK patent application  
450 titled “Use of cerebral nitric oxide donors in the assessment of the extent of brain dysfunction  
451 following injury.”

452

453

## 454 **References**

- 455 Andersson JL, Jenkinson M & Smith S (2007). Non-linear registration, aka Spatial normalisation  
456 FMRIB technical report TR07JA2. FMRIB Analysis Group of the University of Oxford.
- 457 Beckmann CF & Smith SM (2004). Probabilistic Independent Component Analysis for  
458 Functional Magnetic Resonance Imaging. *IEEE Transactions on Medical Imaging* 23, 137–  
459 152.
- 460 Beckmann CF, Mackay CE, Filippini N & Smith SM (2009). Group comparison of resting-state  
461 FMRI data using multi-subject ICA and dual regression. *NeuroImage* 47, S148.
- 462 Bogaerts K, Notebaert K, Van Diest I, Devriese S, De Peuter S & Van den Bergh O (2005).  
463 Accuracy of respiratory symptom perception in different affective contexts. *J Psychosom*  
464 *Res* 58, 537–543.
- 465 Borg E, Borg G, Larsson K, Letzter M & Sundblad BM (2010). An index for breathlessness and  
466 leg fatigue. *Scand J Med Sci Sports* 20, 644–650.
- 467 Brooks JCW, Faull OK, Pattinson KTS & Jenkinson M (2013). Physiological noise in brainstem  
468 FMRI. *Front Hum Neurosci* 7, 623–13.
- 469 Carrieri-Kohlman V, Gormley JM, Douglas MK, Paul SM & Stulbarg MS (1996). Exercise  
470 training decreases dyspnea and the distress and anxiety associated with it: monitoring alone  
471 may be as effective as coaching. *Chest Journal* 110, 1526–1535.
- 472 Carrieri-Kohlman V, Gormley JM, Eiser S, Demir-Deviren S, Nguyen H, Paul SM & Stulbarg  
473 MS (2001). Dyspnea and the affective response during exercise training in obstructive  
474 pulmonary disease. *Nursing Research* 50, 136–146.
- 475 Critchley HD, Eccles J & Garfinkel SN (2013). Interaction between cognition, emotion, and the  
476 autonomic nervous system. In *Autonomic Nervous System, Handbook of Clinical Neurology*,  
477 pp. 59–77. Elsevier.
- 478 Davenport PW & Vovk A (2009). Cortical and subcortical central neural pathways in respiratory  
479 sensations. *Respiratory physiology & neurobiology* 167, 72–86.
- 480 Devonshire IM, Papadakis NG, Port M, Berwick J, Kennerley AJ, Mayhew JEW & Overton PG  
481 (2012). Neurovascular coupling is brain region-dependent. *NeuroImage* 59, 1997–2006.
- 482 Eklund A, Nichols TE & Knutsson H (2016). Cluster failure: Why fMRI inferences for spatial  
483 extent have inflated false-positive rate. *PNAS* 113, 7900–7905.
- 484 El-Manshawi A, Killian KJ, Summers E & Jones NL (1986). Breathlessness during exercise with  
485 and without resistive loading. *Journal of Applied Physiology* 61, 896–905.

- 486 Faull O, Hayen A & Pattinson K (2017). Breathlessness and the body: Neuroimaging clues for  
487 the inferential leap. *Cortex*; DOI: 10.1101/117408.
- 488 Faull OK & Pattinson KT (2017). The cortical connectivity of the periaqueductal gray and the  
489 conditioned response to the threat of breathlessness. *Elife* 6, 95.
- 490 Faull OK, Cox PJ & Pattinson KTS (2016a). Psychophysical Differences in Ventilatory  
491 Awareness and Breathlessness between Athletes and Sedentary Individuals. *Front Physiol* 7,  
492 195–199.
- 493 Faull OK, Jenkinson M, Clare S & Pattinson KTS (2015). Functional subdivision of the human  
494 periaqueductal grey in respiratory control using 7 tesla fMRI. *NeuroImage* 113, 356–364.
- 495 Faull OK, Jenkinson M, Ezra M & Pattinson KTS (2016b). Conditioned respiratory threat in the  
496 subdivisions of the human periaqueductal gray. *Elife*; DOI: 10.7554/elife.12047.
- 497 Feldman Barrett LF & Simmons WK (2015). Interoceptive predictions in the brain. *Nat Rev*  
498 *Neurosci* 16, 419–429.
- 499 Feldman H & Friston KJ (2010). Attention, Uncertainty, and Free-Energy. *Front Hum Neurosci*  
500 4, 1–23.
- 501 Fox MD, Corbetta M, Snyder AZ, Vincent JL & Raichle ME (2006). Spontaneous neuronal  
502 activity distinguishes human dorsal and ventral attention systems (vol 103, pg 10046, 2006).  
503 *Proceedings of the National Academy of Sciences* 103, 13560–13560.
- 504 Fox MD, Snyder AZ, Vincent JL, Corbetta M, Van Essen DC & Raichle ME (2005). The human  
505 brain is intrinsically organized into dynamic, anticorrelated functional networks. *Proceedings*  
506 *of the National Academy of Sciences* 102, 9673–9678.
- 507 Garfinkel SN, Manassei MF, Hamilton-Fletcher G, In den Bosch Y, Critchley HD & Engels M  
508 (2016a). Interoceptive dimensions across cardiac and respiratory axes. *Philos Trans R Soc*  
509 *Lond, B, Biol Sci* 371, 20160014–10.
- 510 Garfinkel SN, Tiley C, O’Keeffe S, Harrison NA, Seth AK & Critchley HD (2016b).  
511 Discrepancies between dimensions of interoception in autism: Implications for emotion and  
512 anxiety. *Biological Psychology* 114, 117–126.
- 513 Gerstein GL & Perkel DH (1969). Simultaneously recorded trains of action potentials: analysis  
514 and functional interpretation. *Science* 164, 828–830.
- 515 Geuter S, Boll S, Eippert F & Büchel C (2017). Functional dissociation of stimulus intensity  
516 encoding and predictive coding of pain in the insula. *Elife* 6, e24770.
- 517 Gray MA, Harrison NA, Wiens S & Critchley HD (2007). Modulation of Emotional Appraisal  
518 by False Physiological Feedback during fMRI. *PLoS ONE* 2, e546.
- 519 Greve DN & Fischl B (2009). Accurate and robust brain image alignment using boundary-based

- 520 registration. *NeuroImage* 48, 63–72.
- 521 Handwerker DA, Ollinger JM & D'Esposito M (2004). Variation of BOLD hemodynamic  
522 responses across subjects and brain regions and their effects on statistical analyses.  
523 *NeuroImage* 21, 1639–1651.
- 524 Harvey AK, Pattinson KTS, Brooks JCW, Mayhew SD, Jenkinson M & Wise RG (2008).  
525 Brainstem functional magnetic resonance imaging: Disentangling signal from physiological  
526 noise. *Journal of Magnetic Resonance Imaging* 28, 1337–1344.
- 527 Hayen A, Herigstad M & Pattinson KTS (2013). Understanding dyspnea as a complex individual  
528 experience. *Maturitas* 76, 45–50.
- 529 Hayen A, Wanigasekera V, Faull OK, Campbell SF, Garry PS, Raby SJM, Robertson J, Webster  
530 R, Wise RG, Herigstad M & Pattinson KTS (2017). Opioid suppression of conditioned  
531 anticipatory brain responses to breathlessness. *NeuroImage* 150, 383–394.
- 532 Herigstad M, Faull O, Hayen A, Evans E, Hardinge M, Wiech K & Pattinson KTS (2017).  
533 Treating breathlessness via the brain: Mechanisms underpinning improvements in  
534 breathlessness with pulmonary rehabilitation. *European Respiratory Journal*; DOI:  
535 10.1101/117390.
- 536 Herigstad M, Hayen A, Reinecke A & Pattinson KTS (2016). Development of a dyspnoea word  
537 cue set for studies of emotional processing in COPD. *Respiratory physiology &*  
538 *neurobiology* 223, 37–42.
- 539 Holloszy JO & Coyle EF (1984). Adaptations of Skeletal-Muscle to Endurance Exercise and  
540 Their Metabolic Consequences. *Journal of Applied Physiology* 56, 831–838.
- 541 Jenkinson M, Bannister P, Brady M & Smith S (2002). Improved Optimization for the Robust  
542 and Accurate Linear Registration and Motion Correction of Brain Images. *NeuroImage* 17,  
543 825–841.
- 544 Jones AM & Carter H (2000). The Effect of Endurance Training on Parameters of Aerobic  
545 Fitness. *Sports Medicine* 29, 373–386.
- 546 Kaufman MP & Forster HV (1996). *Reflexes Controlling Circulatory, Ventilatory and Airway*  
547 *Responses to Exercise*. John Wiley & Sons, Inc., Hoboken, NJ, USA.
- 548 Kleckner IR, Zhang J, Touroutoglou A, Chanes L, Xia C, Simmons WK, Quigley KS, Dickerson  
549 BC & Feldman Barrett L (2017). Evidence for a large-scale brain system supporting  
550 allostasis and interoception in humans. *Nat hum behav* 1, 0069–15.
- 551 Lang PJ, Wangelin BC, Bradley MM, Versace F, Davenport PW & Costa VD (2011). Threat of  
552 suffocation and defensive reflex activation. *Psychophysiol* 48, 393–396.
- 553 Lansing RW, Im B, Thwing JI, Legedza A & Banzett RB (2000). The perception of respiratory  
554 work and effort can be independent of the perception of air hunger. *Am J Respir Crit Care*



- 555 Med 162, 1690–1696.
- 556 Ling S & Carrasco M (2006). When sustained attention impairs perception. *Nat Neurosci* 9,  
557 1243–1245.
- 558 Mallorqui-Bague N, Bulbena A, Pailhez G, Garfinkel SN & Critchley HD (2016). Mind-Body  
559 Interactions in Anxiety and Somatic Symptoms. *Harvard Review of Psychiatry* 24, 53–60.
- 560 McKay LC, Adams L, Frackowiak RSJ & Corfield DR (2008). A bilateral cortico-bulbar  
561 network associated with breath holding in humans, determined by functional magnetic  
562 resonance imaging. *NeuroImage* 40, 1824–1832.
- 563 Merikle PM & Joordens S (1997). Parallels between Perception without Attention and  
564 Perception without Awareness. *Consciousness and cognition* 6, 219–236.
- 565 Miller KL et al. (2016). Multimodal population brain imaging in the UK Biobank prospective  
566 epidemiological study. *Nat Neurosci* 19, 1523–1536.
- 567 Parshall MB, Schwartzstein RM, Adams L, Banzett RB, Manning HL, Bourbeau J, Calverley  
568 PM, Gift AG, Harver A, Lareau SC, Mahler DA, Meek PM & O'Donnell DE (2012). An  
569 Official American Thoracic Society Statement: Update on the Mechanisms, Assessment, and  
570 Management of Dyspnea. *Am J Respir Crit Care Med* 185, 435–452.
- 571 Pattinson K, Mitsis GD, Harvey AK & Jbabdi S (2009a). Determination of the human brainstem  
572 respiratory control network and its cortical connections in vivo using functional and  
573 structural imaging. *NeuroImage* 44, 295–305.
- 574 Pattinson KTS, Governo RJ, MacIntosh BJ, Russell EC, Corfield DR, Tracey I & Wise RG  
575 (2009b). Opioids Depress Cortical Centers Responsible for the Volitional Control of  
576 Respiration. *Journal of Neuroscience* 29, 8177–8186.
- 577 Paulus MP, Flagan T, Simmons AN, Gillis K, Kotturi S, Thom N, Johnson DC, Van Orden KF,  
578 Davenport PW & Swain JL (2012). Subjecting Elite Athletes to Inspiratory Breathing Load  
579 Reveals Behavioral and Neural Signatures of Optimal Performers in Extreme Environments  
580 ed. Lucia A. *PLoS ONE* 7, e29394.
- 581 Pavlov IP (1927). *Conditioned Reflexes*.
- 582 Phelps EA, Ling S & Carrasco M (2006). Emotion facilitates perception and potentiates the  
583 perceptual benefits of attention. *Psychol Sci* 17, 292–299.
- 584 Porro CA, Baraldi P, Pagnoni G, Serafini M, Facchin P, Maieron M & Nichelli P (2002). Does  
585 anticipation of pain affect cortical nociceptive systems? *The Journal of Neuroscience* 22,  
586 3206–3214.
- 587 Price DD, Milling LS, Kirsch I, Duff A, Montgomery GH & Nicholls SS (1999). An analysis of  
588 factors that contribute to the magnitude of placebo analgesia in an experimental paradigm.  
589 *Pain* 83, 147–156.



- 590 Simmons WK, Avery JA, Barcalow JC, Bodurka J, Drevets WC & Bellgowan P (2012). Keeping  
591 the body in mind: Insula functional organization and functional connectivity integrate  
592 interoceptive, exteroceptive, and emotional awareness. *Human brain mapping* 34, 2944–  
593 2958.
- 594 Smith SM (2002). Fast robust automated brain extraction. *Human brain mapping* 17, 143–155.
- 595 Smith SM, Fox PT, Miller KL, Glahn DC, Fox PM, Mackay CE, Filippini N, Watkins KE, Toro  
596 R, Laird AR & Beckmann CF (2009). Correspondence of the brain's functional architecture  
597 during activation and rest. 1–6.
- 598 Smith SM, Nichols TE, Vidaurre D, Winkler AM, Behrens TEJ, Glasser MF, Ugurbil K, Barch  
599 DM, Van Essen DC & Miller KL (2015). A positive-negative mode of population  
600 covariation links brain connectivity, demographics and behavior. *Nature Med* 18, 1565–1567.
- 601 Spinhoven P, vanPeskiOosterbaan AS, VanderDoes A, Willems L & Sterk PJ (1997).  
602 Association of anxiety with perception of histamine induced bronchoconstriction in patients  
603 with asthma. *Thorax* 52, 149–152.
- 604 Takano N, Inaishi S & Zhang Y (1997). Individual differences in breathlessness during exercise,  
605 as related to ventilatory chemosensitivities in humans. *The Journal of Physiology* 499, 843–  
606 848.
- 607 Tang J & Gibson S (2005). A Psychophysical Evaluation of the Relationship Between Trait  
608 Anxiety, Pain Perception, and Induced State Anxiety. *The Journal of Pain* 6, 612–619.
- 609 Van den Bergh O, Witthöft M, Petersen S & Brown RJ (2017). Symptoms and the body: Taking  
610 the inferential leap. *Neuroscience & Biobehavioral Reviews* 74, 185–203.
- 611 Van Den Heuvel MP & Pol HEH (2010). Exploring the brain network: a review on resting-state  
612 fMRI functional connectivity. *European Neuropsychopharmacology* 20, 519–534.
- 613 Vossel S, Geng JJ & Fink GR (2014). Dorsal and Ventral Attention Systems: Distinct Neural  
614 Circuits but Collaborative Roles. *Neuroscientist* 20, 150–159.
- 615 Wager TD, Rilling JK, Smith EE, Sokolik A, Casey KL, Davidson RJ, Kosslyn SM, Rose RM &  
616 Cohen JD (2004). Placebo-Induced Changes in fMRI in the Anticipation and Experience of  
617 Pain. *Science* 303, 1162–1167.
- 618 Wager TD, Waugh CE, Lindquist M, Noll DC, Fredrickson BL & Taylor SF (2009). Brain  
619 mediators of cardiovascular responses to social threat. *NeuroImage* 47, 821–835.
- 620 Waldrop TG, Eldridge FL, Iwamoto GA & Mitchell JH (2010). *Central Neural Control of  
621 Respiration and Circulation During Exercise*, 2nd edn. John Wiley & Sons, Inc., Hoboken,  
622 NJ, USA.
- 623 Winkler AM, Ridgway GR, Webster MA, Smith SM & Nichols TE (2014). Permutation  
624 inference for the general linear model. *NeuroImage* 92, 381–397.

625 Woolrich MW, Behrens TEJ, Beckmann CF, Jenkinson M & Smith SM (2004). Multilevel linear  
626 modelling for FMRI group analysis using Bayesian inference. *NeuroImage* 21, 1732–1747.

627 Woolrich MW, Ripley BD, Brady M & Smith SM (2001). Temporal Autocorrelation in  
628 Univariate Linear Modeling of FMRI Data. *NeuroImage* 14, 1370–1386.

629

## Tables

630  
631  
632  
633  
634  
635  
636

**Table 1.** Mean ( $\pm$ sd) physiological variables across conditioned respiratory tasks. \*Significantly ( $p < 0.05$ ) different from sedentary group. Abbreviations:  $P_{ET}CO_2$ , pressure of end-tidal carbon dioxide;  $P_{ET}O_2$ , pressure of end-tidal oxygen; RVT, respiratory volume per unit time; bpm, beats per minute.

|                                 | Unloaded breathing |                | Anticipation  |                | Breathlessness |                |
|---------------------------------|--------------------|----------------|---------------|----------------|----------------|----------------|
|                                 | ATHLETE            | SEDENTARY      | ATHLETE       | SEDENTARY      | ATHLETE        | SEDENTARY      |
| $P_{ET}CO_2$ (mmHg)             | 35.96 (5.56)       | 35.08 (3.20)   | 35.50 (5.81)  | 34.76 (3.60)   | 36.34 (6.23)   | 35.40 (3.92)   |
| $P_{ET}O_2$ (mmHg)              | 129.68 (6.41)      | 134.09 (15.15) | 129.55 (6.75) | 133.59 (13.47) | 131.18 (6.83)  | 137.55 (16.42) |
| Respiratory rate ( $min^{-1}$ ) | 10.15 (2.59)*      | 13.35 (3.51)   | 9.99 (2.63)*  | 12.93 (4.29)   | 9.40 (3.58)    | 11.54 (5.11)   |
| RVT (% change from baseline)    | -4.06 (5.70)       | -0.56 (7.94)   | -0.03 (12.14) | 6.07 (18.78)   | -20.00 (24.88) | -13.23 (28.54) |

637  
638  
639  
640  
641

**Table 2.** Mean ( $\pm$ sd) physiological and psychological variables during breathlessness for both athletes and sedentary subjects.

|                                         | ATHLETE     | SEDENTARY   |
|-----------------------------------------|-------------|-------------|
| Peak mouth pressure ( $cmH_2O$ )        | 14.4 (8.5)  | 12.0 (5.8)  |
| Breathlessness intensity rating (%)     | 46.3 (14.1) | 46.7 (18.1) |
| Breathlessness anxiety rating (%)       | 31.9 (17.8) | 36.1 (20.0) |
| Unloaded breathing intensity rating (%) | 2.3 (3.5)   | 3.4 (3.4)   |
| Unloaded breathing anxiety rating (%)   | 2.8 (4.8)   | 2.2 (2.7)   |

642

## Figure legends

643  
644  
645  
646  
647  
648  
649  
650  
651  
652  
653  
654  
655  
656  
657  
658  
659  
660  
661  
662  
663  
664  
665  
666  
667  
668  
669  
670  
671  
672  
673  
674  
675  
676  
677  
678  
679  
680  
681  
682  
683  
684

**Figure 1. Mean BOLD activity in athletes and sedentary controls.** Top: BOLD activity during conditioned anticipation of breathlessness. Bottom: BOLD activity during a breathlessness challenge, induced via inspiratory resistive loading. The images consist of a colour-rendered statistical map superimposed on a standard (MNI 1x1x1 mm) brain, and significant regions are displayed with a non-parametric cluster probability threshold of  $t < 3.1$ ;  $p < 0.05$  (corrected for multiple comparisons). Abbreviations: M1, primary motor cortex; SMC, supplementary motor cortex; dACC, dorsal anterior cingulate cortex; PCC, posterior cingulate cortex; dlPFC, dorsolateral prefrontal cortex; a-In, anterior insula; OP, operculum; amyg, amygdala; hipp, hippocampus; Crus-I, cerebellar lobe; activation, increase in BOLD signal; deactivation, decrease in BOLD signal.

**Figure 2. Interaction between groups and breathlessness scores.** Left: BOLD activity during conditioned anticipation of breathlessness. Red-yellow = BOLD activity correlating with intensity scores in athletes > sedentary subjects; blue-light blue = BOLD activity correlating with anxiety scores in sedentary > athletic subjects. Right: Percentage BOLD signal change within the (red-yellow) intensity-correlated imaging mask against intensity scores, demonstrating a positive, linear correlation in athletes and a negative relationship in sedentary subjects. The images consist of a colour-rendered statistical map superimposed on a standard (MNI 1x1x1 mm) brain, and significant regions are displayed with a non-parametric cluster probability threshold of  $t < 3.1$ ;  $p < 0.05$  (corrected for multiple comparisons). Abbreviations: M1, primary motor cortex; a-In, anterior insula; m-In, middle insula; hipp, hippocampus; put, putamen; CN, caudate nucleus; VPL, ventral posterolateral thalamic nucleus.

**Figure 3. Differences in resting functional connectivity between athletes and sedentary subjects.** Increased functional connectivity (purple) observed in athletes between an area of primary motor cortex that is active during breathlessness (right) and a cingulo-opercular task-positive network (left) identified at rest. The images consist of a colour-rendered statistical map superimposed on a standard (MNI 1x1x1 mm) brain, and significant regions are displayed with a non-parametric cluster probability threshold of  $t < 3.1$ ;  $p < 0.05$  (corrected for multiple comparisons).

**Figure 4. Previously reported differences in ventilatory perceptions between athletes and sedentary subjects. \*Significantly different slope from sedentary subjects.** Subject-specific change in breathlessness anxiety and intensity scores plotted against percentage change in ventilation from baseline, induced by both mild (top) and moderate (bottom) hypercapnia (mild hypercapnia: aim of 0.8%; and moderate hypercapnia: aim of 1.5% increase in end-tidal carbon

685 dioxide, end-tidal oxygen was maintained constant). Athletes are plotted in the left column, and  
686 sedentary subjects in the right column. During both mild and moderate hypercapnia, the athlete  
687 group showed a positive linear correlation between change in ventilation and change in breathing  
688 anxiety that was significantly different from sedentary subjects (slope difference: mild  $p = 0.018$ ;  
689 moderate  $p = 0.011$ ). Athletes also demonstrated significant positive correlations for  
690 breathlessness intensity against change in ventilation, where the slope was significantly different  
691 to sedentary subjects in moderate ( $p = 0.047$ ) but not mild ( $p = 0.177$ ) hypercapnia. 95%  
692 Confidence intervals are shown. Figure is recreated from previously published data (Faull *et al.*,  
693 2016a) under the Creative Commons license.

*ATHLETES*

**ANTICIPATION**

*SEDENTARY*

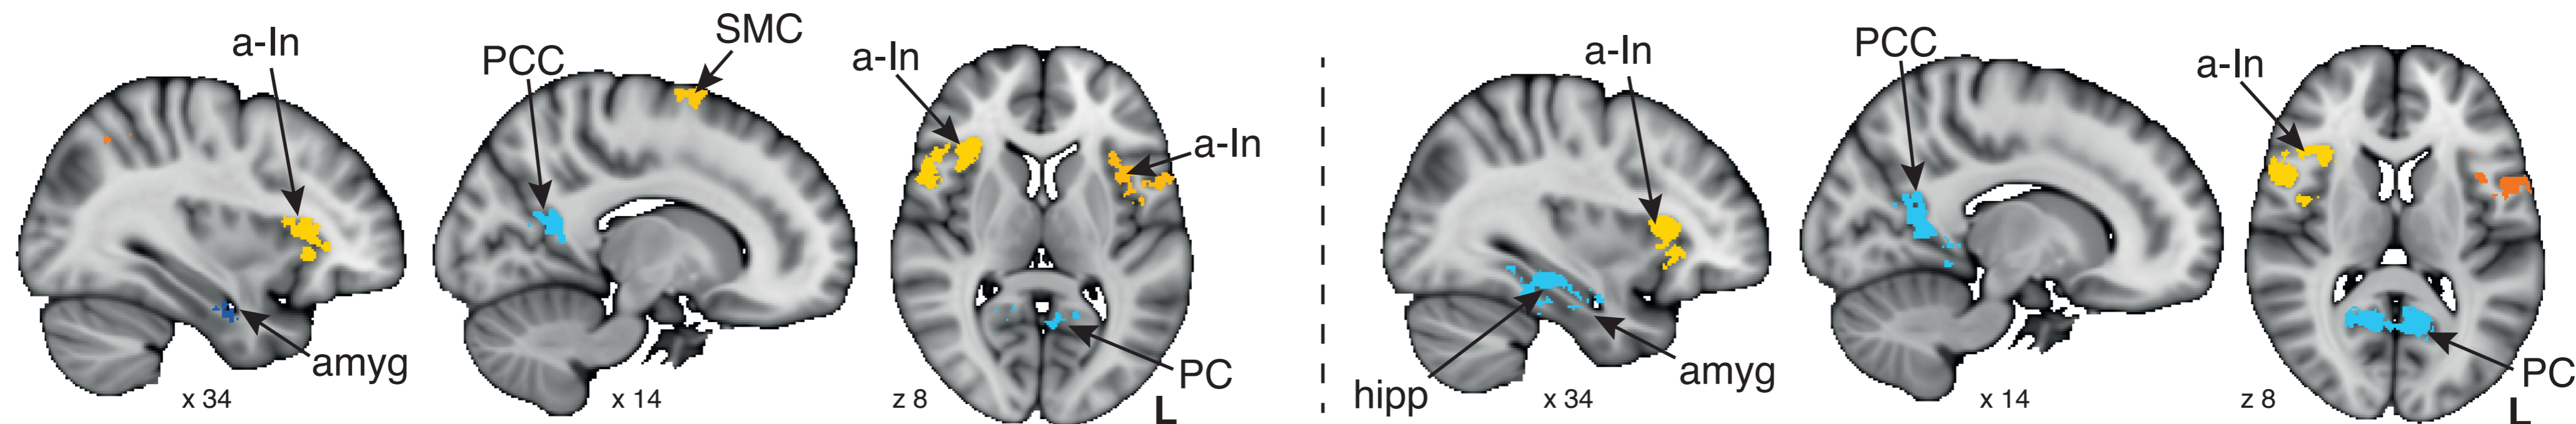

*ATHLETES*

**BREATHLESSNESS**

*SEDENTARY*

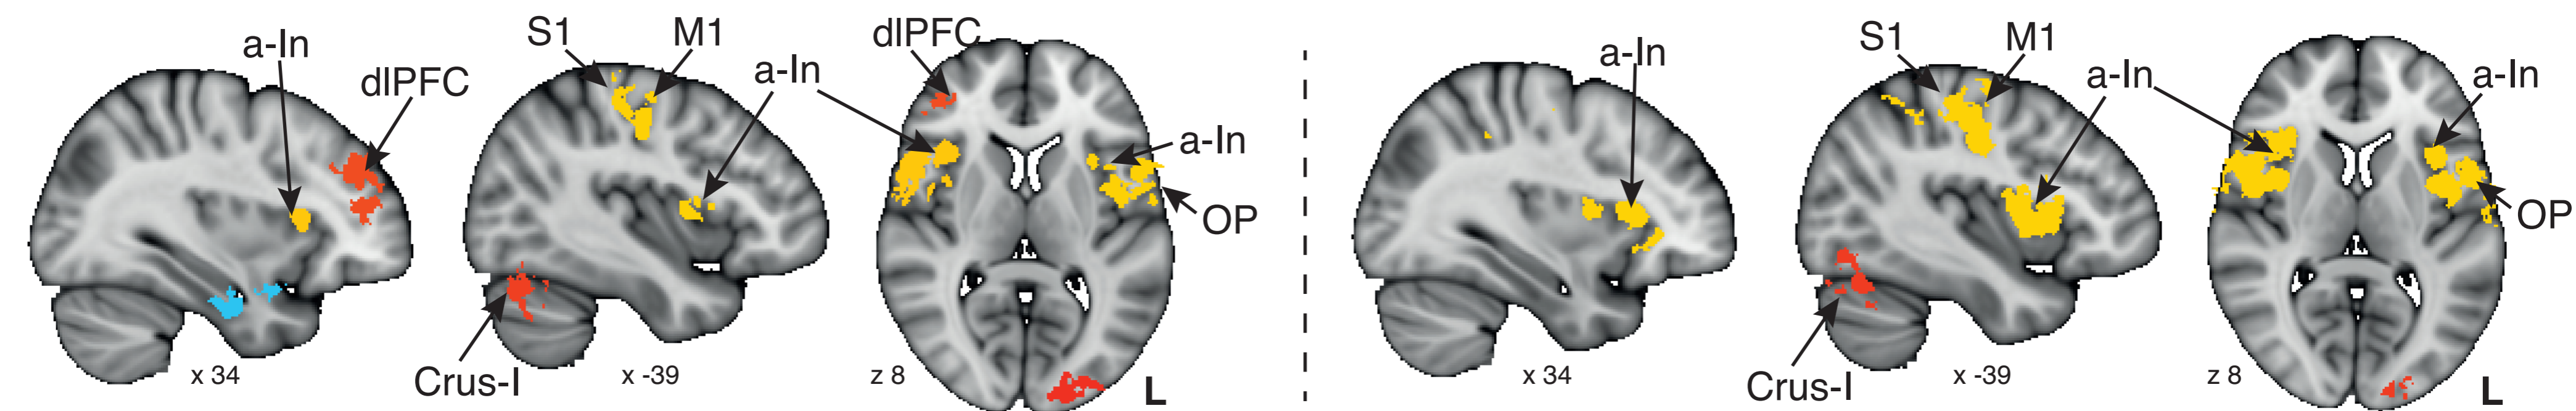

activation 0.05  <0.001 Cortex p value 0.05  <0.001 deactivation



# ANTICIPATION SCALING WITH BREATHLESSNESS SCORES

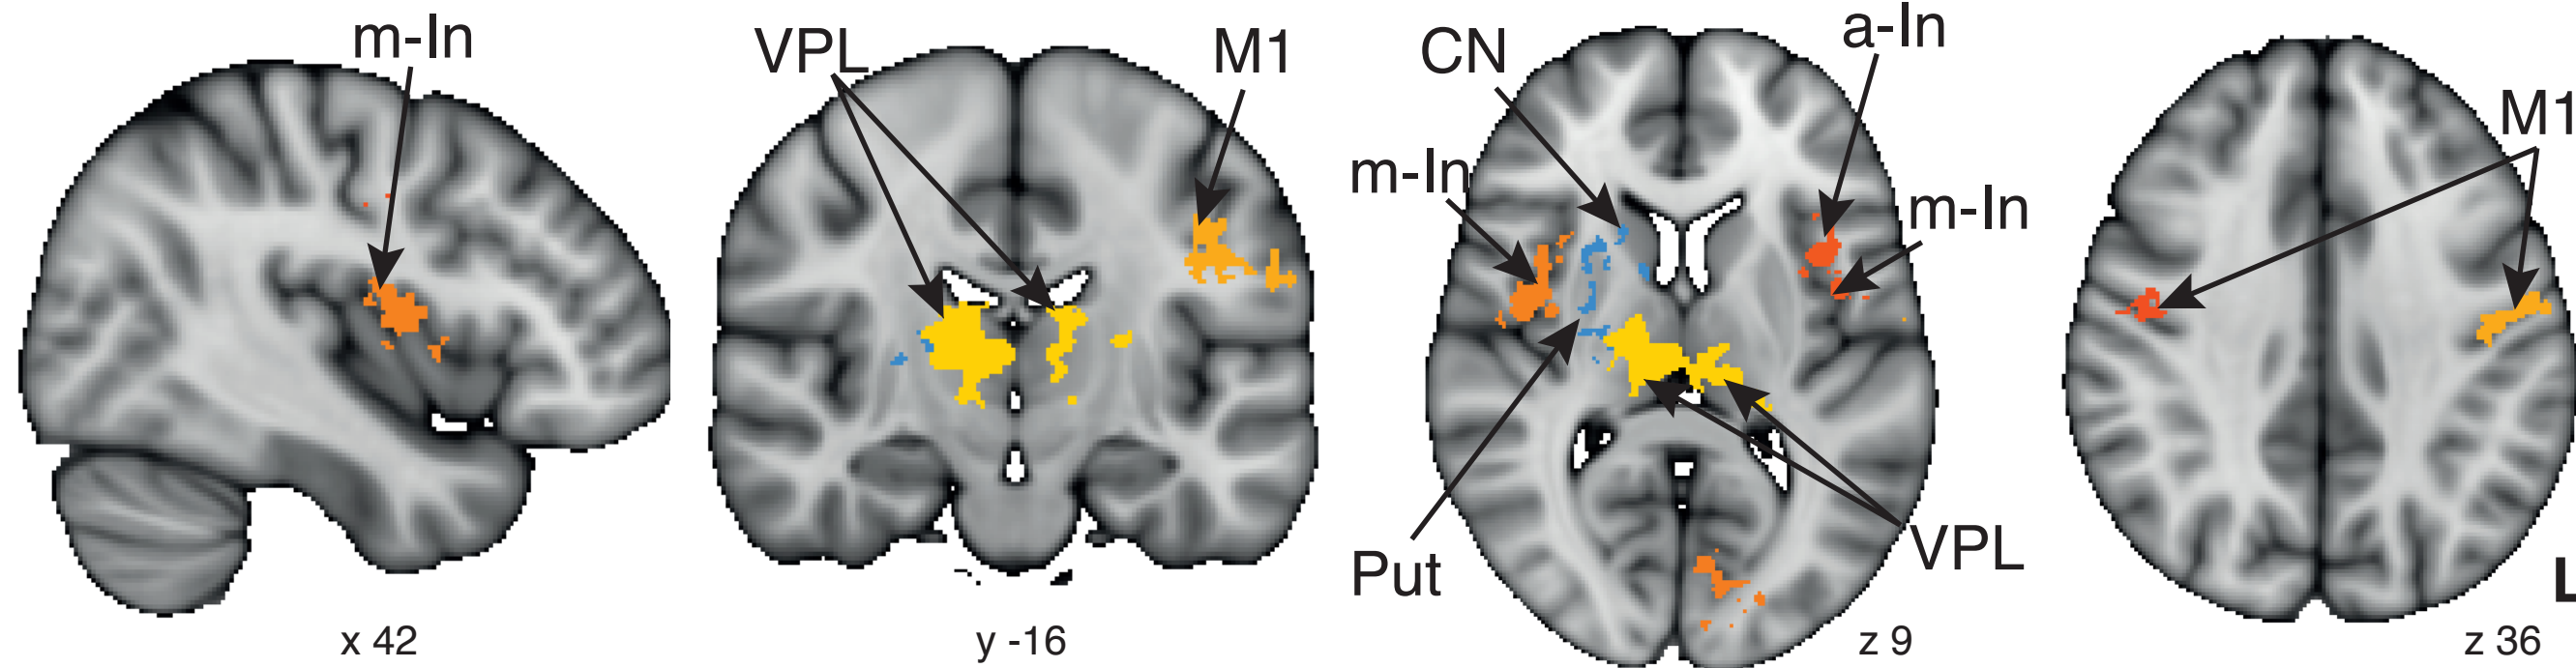

## BRAIN ACTIVITY CORRELATING WITH INTENSITY

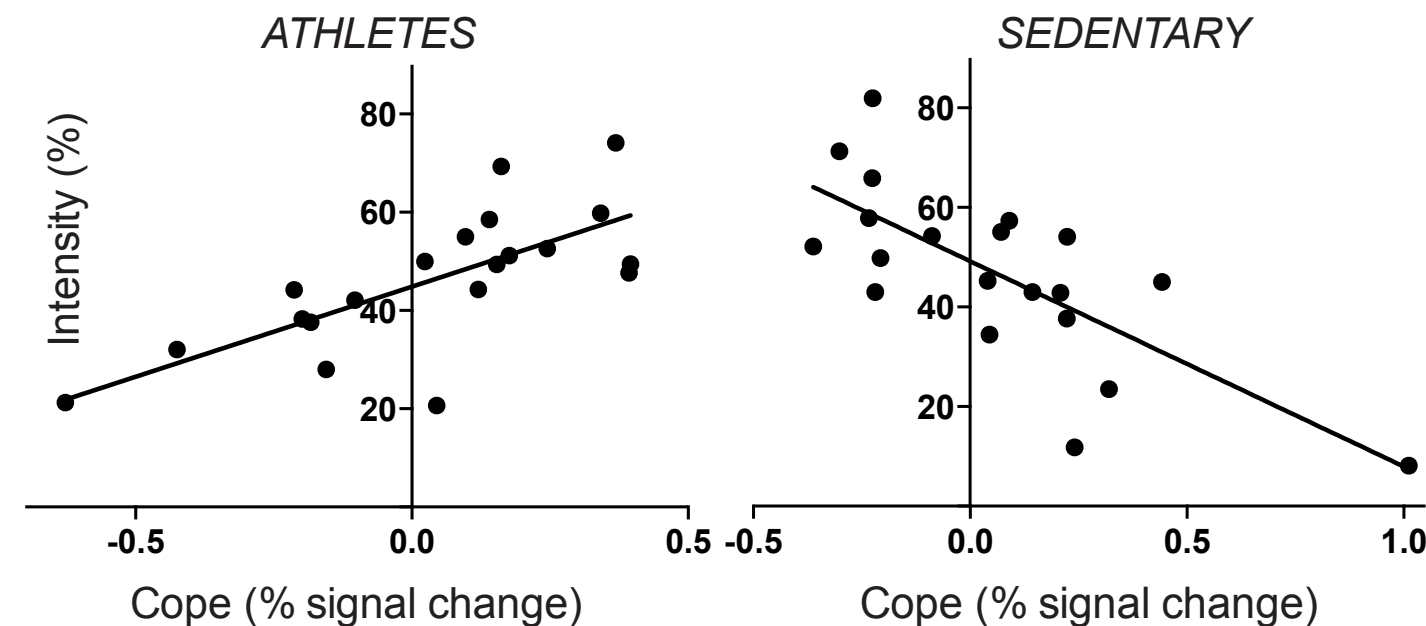

ath > sed 0.05 **INTENSITY** <0.001 Cortex p value 0.05 **ANXIETY** <0.001 sed > ath

# TASK-POSITIVE NETWORK

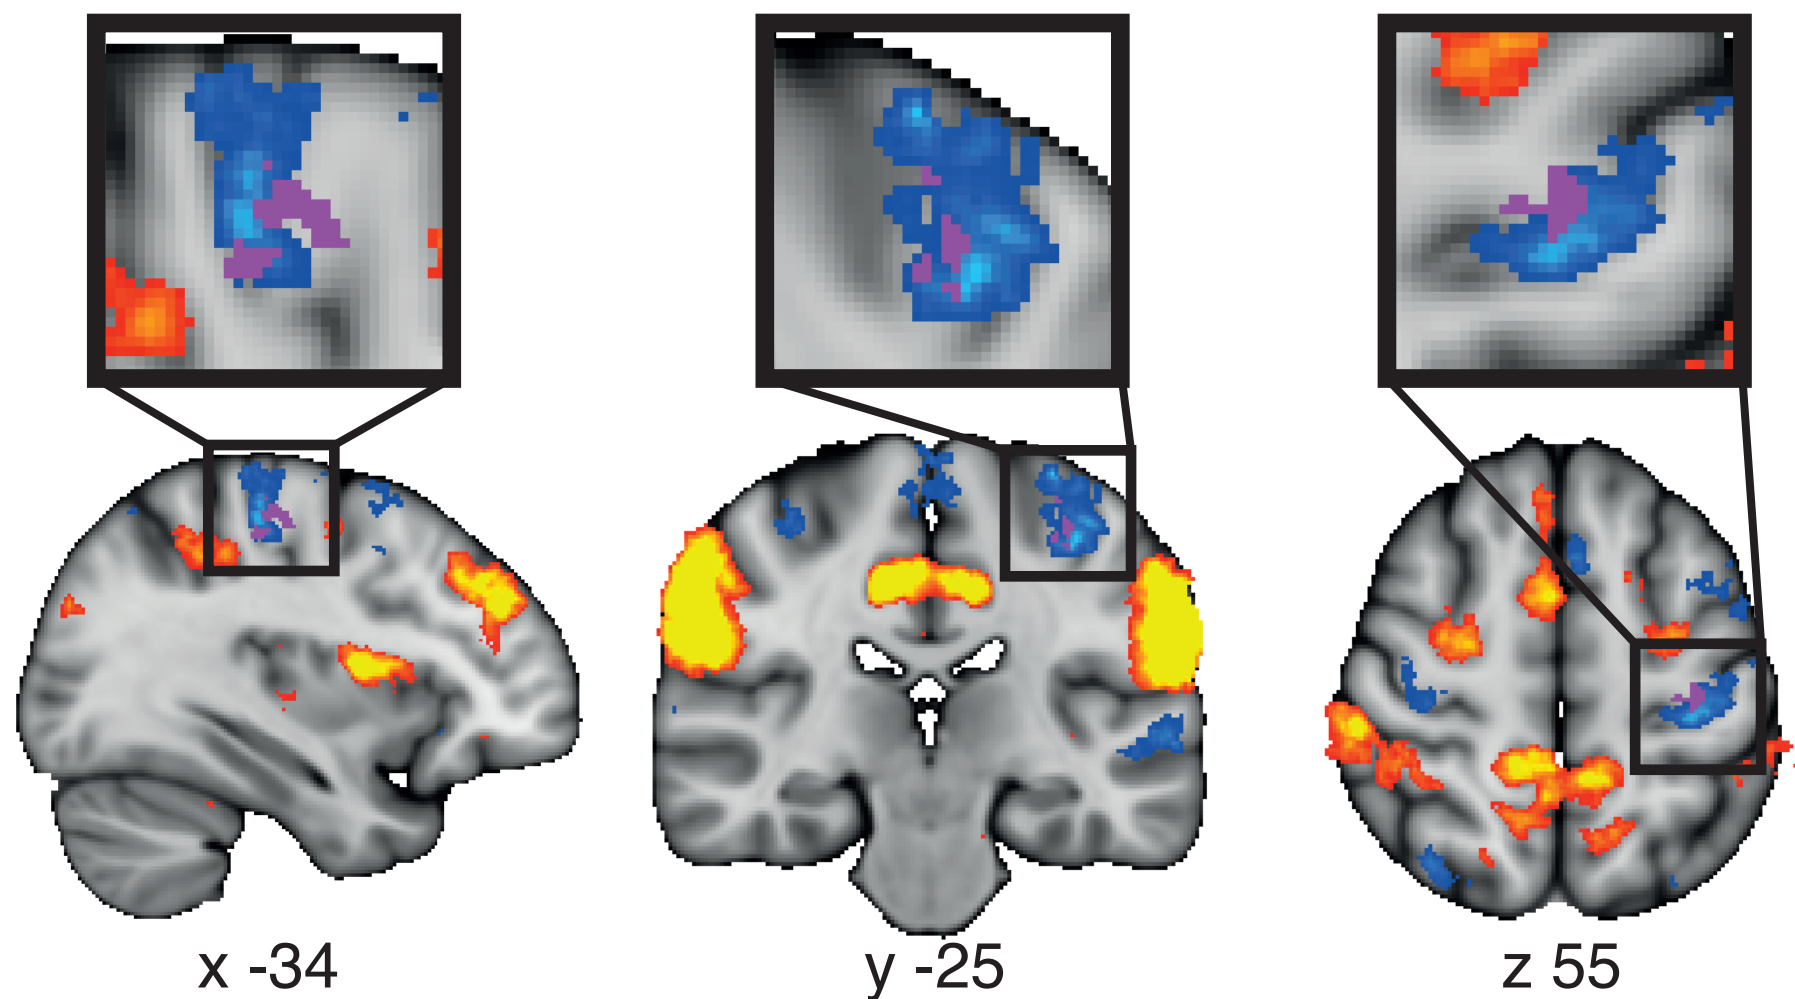

# BREATHLESSNESS

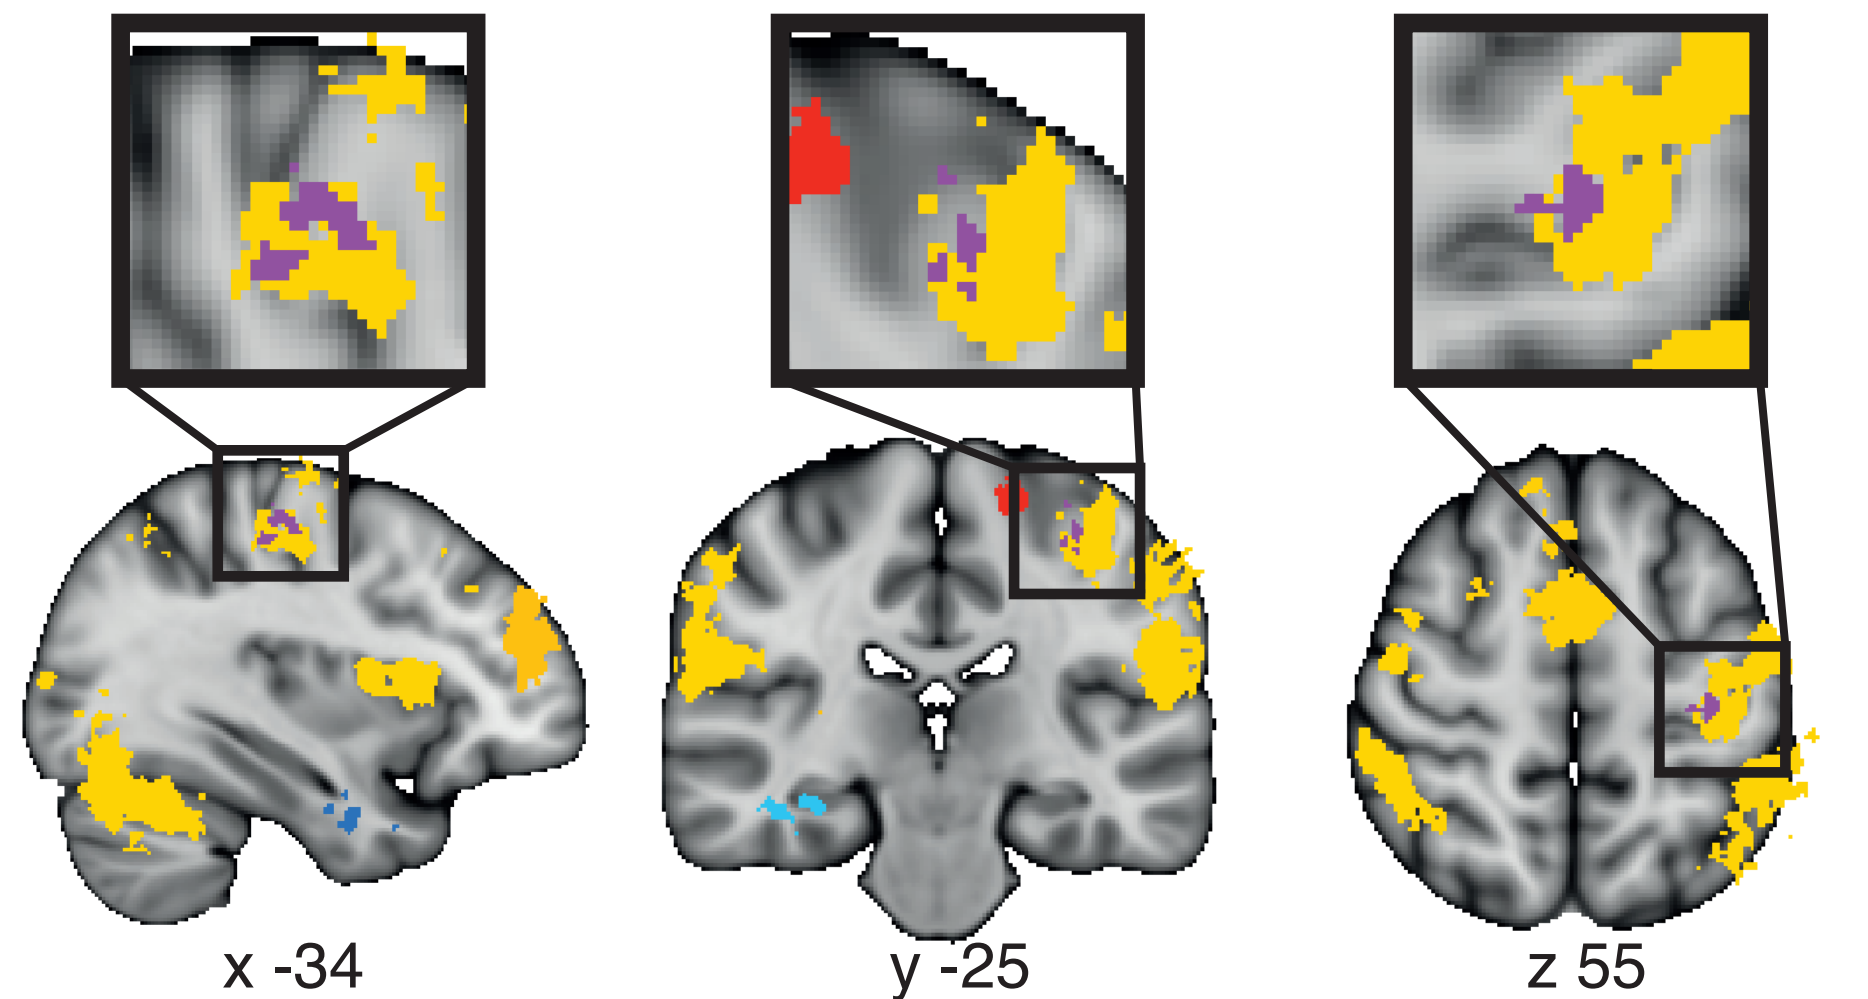

activation 3.0 6.0 Cortex Z score 3.0 6.0 deactivation

$ath > sed$   
 $p = 0.019$

activation 0.05  $<0.001$  Cortex p value 0.05  $<0.001$  deactivation



# MILD HYPERCAPNIA

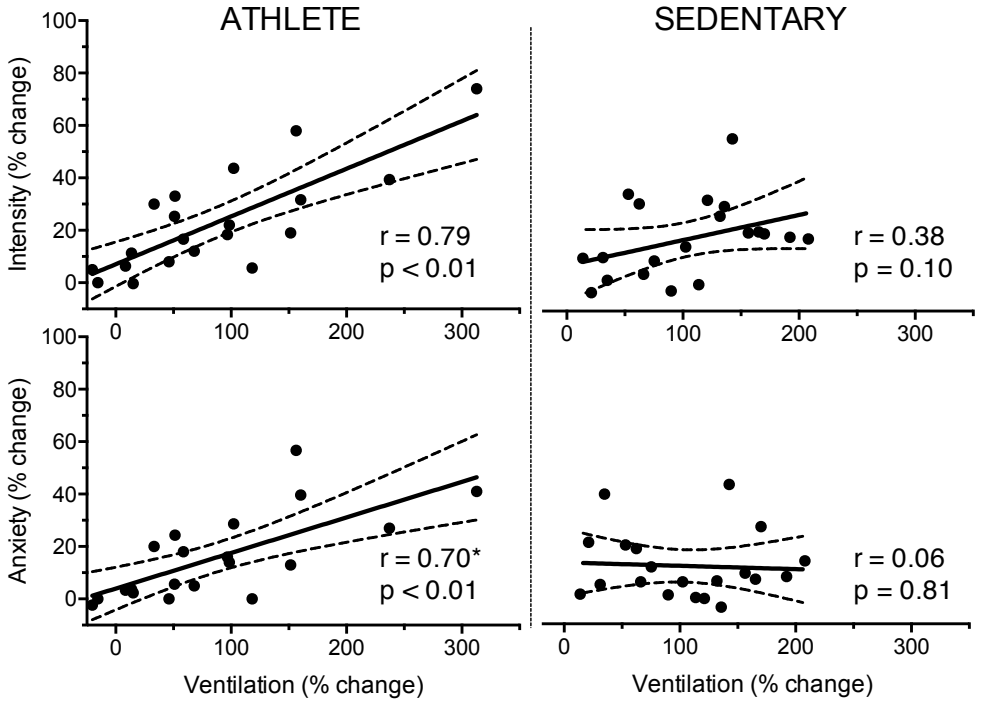

# MODERATE HYPERCAPNIA

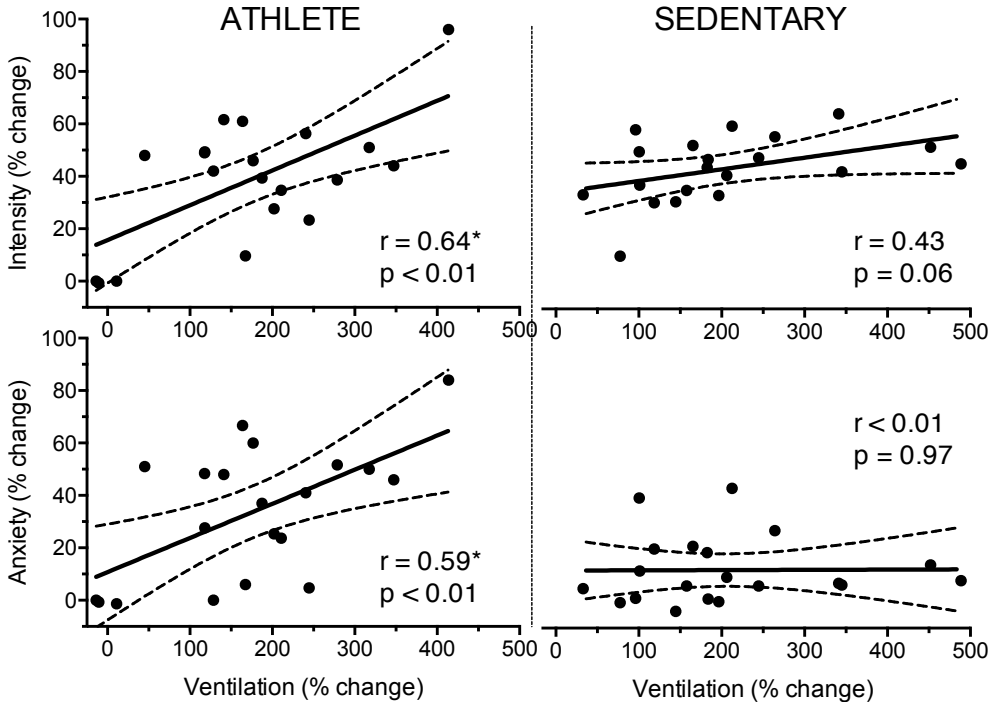

Source: https://www.biorxiv.org/content/10.1101/174052v2.full.pdf
